Anesthesiology  
1998; 89:165-73  
© 1998 American Society of Anesthesiologists, Inc.  
Lippincott-Raven Publishers

## Role of Intracellular $\text{Ca}^{2+}$ Stores in the Inhibitory Effect of Halothane on Airway Smooth Muscle Contraction

Michiaki Yamakage, M.D., Ph.D.,\* Shinji Kohro, M.D., Ph.D.,† Takashi Matsuzaki, M.D., Ph.D.,‡ Hideaki Tsuchida, M.D., Ph.D.,§ Akiyoshi Namiki, M.D., Ph.D.,§

**Background:** Halothane directly inhibits contraction of airway smooth muscle, mainly by decreasing the intracellular concentration of free  $\text{Ca}^{2+}$  ( $[\text{Ca}^{2+}]_i$ ). The role of intracellular  $\text{Ca}^{2+}$  stores, sarcoplasmic reticulum, is still unclear. We investigated the role of sarcoplasmic reticulum in the inhibitory effect of halothane on contraction of airway smooth muscle by measuring  $[\text{Ca}^{2+}]_i$  and intracellular concentration of inositol 1,4,5-triphosphate ( $\text{IP}_3$ ), a second messenger for release of  $\text{Ca}^{2+}$  from sarcoplasmic reticulum.

**Methods:**  $[\text{Ca}^{2+}]_i$  was monitored by measuring the 500-nm light emission ratio ( $F_{340}/F_{380}$ ) of a  $\text{Ca}^{2+}$  indicator fura-2 with isometric tension of canine tracheal smooth muscle strip. During  $\text{Ca}^{2+}$ -free conditions, carbachol ( $10^{-5}$  M) was introduced with pretreatment of halothane (0–3%). During  $\text{Ca}^{2+}$ -free conditions, 20 mM caffeine, a  $\text{Ca}^{2+}$ -induced  $\text{Ca}^{2+}$  release channel opener, was introduced with or without halothane. We measured  $\text{IP}_3$  during exposure to carbachol and halothane by radioimmunoassay technique.

**Results:** Pretreatment with halothane significantly diminished carbachol-induced increases in  $[\text{Ca}^{2+}]_i$  by 77% and muscle tension by 83% in a dose-dependent manner. Simultaneous administration of halothane significantly enhanced caffeine-induced transient increases in  $[\text{Ca}^{2+}]_i$  and muscle tension in a dose-dependent manner, by 97% and 69%, respectively. Pretreatment with halothane abolished these responses. Rapid increase in  $\text{IP}_3$  produced by carbachol was significantly inhibited by 32% by halothane in a dose-dependent manner.

**Conclusions:** Halothane, during  $\text{Ca}^{2+}$ -free conditions, inhibits transient contraction of airway smooth muscle induced by muscarinic receptor stimulation, mainly by attenuating the

increase in  $[\text{Ca}^{2+}]_i$ . Depletion of  $\text{Ca}^{2+}$  from sarcoplasmic reticulum via  $\text{Ca}^{2+}$ -induced  $\text{Ca}^{2+}$  release channels also may contribute to the attenuation of the increase in  $[\text{Ca}^{2+}]_i$  by halothane. (Key words: Calcium; calcium-induced  $\text{Ca}^{2+}$  release (CICR) channel; inositol 1,4,5-triphosphate ( $\text{IP}_3$ );  $\text{IP}_3$ -induced  $\text{Ca}^{2+}$  release (IICR) channel; sarcoplasmic reticulum.)

HALOTHANE has a potent and direct relaxing effect on airway smooth muscle.<sup>1,2</sup> Because the intracellular concentration of free  $\text{Ca}^{2+}$  ( $[\text{Ca}^{2+}]_i$ ) plays a central role in the regulation of airway smooth muscle tone,<sup>3,4</sup> a possible mechanism for relaxation by this anesthetic agent is a decrease in  $[\text{Ca}^{2+}]_i$ . Yamakage<sup>2</sup> and Jones *et al.*,<sup>5</sup> using the  $\text{Ca}^{2+}$  indicator fura-2, demonstrated that relaxation of contracted canine tracheal smooth muscle by halothane at clinically relevant concentrations was associated with a decrease in  $[\text{Ca}^{2+}]_i$ .  $[\text{Ca}^{2+}]_i$  is regulated by influx of  $\text{Ca}^{2+}$  through membrane-associated  $\text{Ca}^{2+}$  channels (voltage-dependent and  $\text{Ca}^{2+}$  depletion-activated  $\text{Ca}^{2+}$  channels) and by release of  $\text{Ca}^{2+}$  from intracellular  $\text{Ca}^{2+}$  stores, especially from sarcoplasmic reticulum (SR) (fig. 1).<sup>3</sup> Entry of extracellular  $\text{Ca}^{2+}$  through voltage-dependent channels is necessary for maintenance of the contraction of airway smooth muscle.<sup>2,6</sup> Yamakage *et al.*,<sup>7</sup> using patch clamp techniques, demonstrated that halothane had an inhibitory effect on the voltage-dependent channels of porcine tracheal smooth muscle cells at clinically relevant concentrations. The role, however, of intracellular  $\text{Ca}^{2+}$  stores, called SR, in the inhibitory effect of halothane on airway smooth muscle contraction is still unclear.

Release of  $\text{Ca}^{2+}$  from SR in airway smooth muscle is regulated by two mechanisms: inositol 1,4,5-triphosphate ( $\text{IP}_3$ )-induced  $\text{Ca}^{2+}$  release (IICR)<sup>8</sup> and  $\text{Ca}^{2+}$ -induced  $\text{Ca}^{2+}$  release (CICR) channels (fig. 1).<sup>9</sup> The current study therefore was designed to clarify the role of SR in the inhibitory effect of halothane on contraction of airway smooth muscle (1) by measuring  $[\text{Ca}^{2+}]_i$  simultaneously with muscle tension during exposure to a

\* Instructor.

† Fellow.

‡ Assistant Professor.

§ Professor; Chairman.

Received from the Department of Anesthesiology, Sapporo Medical University School of Medicine, Sapporo, Hokkaido, Japan. Submitted for publication August 20, 1997. Accepted for publication March 13, 1998. Presented in part at the annual meeting of the American Society of Anesthesiologists, New Orleans, Louisiana, October 19–23, 1996.

Address reprint requests to Dr. Yamakage: Department of Anesthesiology, Sapporo Medical University School of Medicine, South-1, West-16, Chuo-ku, Sapporo, Hokkaido, 060-0061, Japan. Address electronic mail to: yamakage@sapmed.ac.jp



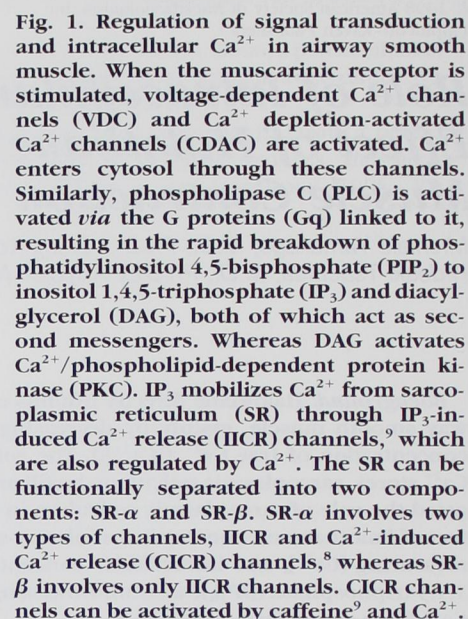

Anesthesiology, V 89, No 1, Jul 1998



## HALOTHANE AND INTRACELLULAR $\text{Ca}^{2+}$ STORES

solution was substituted transiently (for  $\approx 5$  s) with  $\text{Ca}^{2+}$ -free PSS (with 5 mM EGTA) to remove  $\text{Ca}^{2+}$  from the cell surface<sup>11</sup> and then substituted with  $\text{Ca}^{2+}$ -free PSS (with 50  $\mu\text{M}$  EGTA) to maintain  $[\text{Ca}^{2+}]_i$  at the normal resting level. During this condition, the muscle strip was stimulated with  $10^{-5}$  M carbachol, a potent muscarinic receptor agonist. After this protocol, the muscle strip was reincubated with PSS, including 1.5 mM  $\text{Ca}^{2+}$ . A second contraction was evoked by 72.7 mM high  $\text{K}^+$  solution to restore  $\text{Ca}^{2+}$  in SR.<sup>11</sup> The PSS was again substituted with  $\text{Ca}^{2+}$ -free PSS as described earlier. During this condition, halothane (1.0, 2.0, or 3.0% in the gas phase) was introduced into a bath solution for 3 min, and the muscle strip was stimulated with  $10^{-5}$  M carbachol. The concentration of carbachol ( $10^{-5}$  M) used in this study could induce maximum contraction<sup>12</sup> and maximum increase in  $[\text{IP}_3]_i$ .<sup>13</sup> The order of these two protocols was randomized.

In another experiment, the first contraction was similarly evoked by a 72.7 mM high  $\text{K}^+$  solution, which served as a control (100%). After washing the muscle strip with PSS, including 1.5 mM  $\text{Ca}^{2+}$ , the organ bath solution was substituted with  $\text{Ca}^{2+}$ -free PSS as described earlier. During this condition, the muscle strip was exposed to 20 mM caffeine, a CICR opener.<sup>9</sup> After this protocol, the same strip was similarly reincubated with PSS, including 1.5 mM  $\text{Ca}^{2+}$ , and the PSS was again substituted with  $\text{Ca}^{2+}$ -free PSS. Halothane (1.0, 2.0, or 3.0% in the gas phase) and caffeine (20 mM) were introduced simultaneously into the bath solution or halothane was preintroduced into the bath solution for 3 min. The muscle strip was then exposed to 20 mM caffeine during this condition. The order of these three protocols was randomized.

To further investigate the effect of other anesthetic agents on the increase of  $[\text{Ca}^{2+}]_i$  attributable to release of  $\text{Ca}^{2+}$  from SR, we performed additional experiments using isoflurane (range, 0.0–4.5%) in the absence of external  $\text{Ca}^{2+}$ .

### Measurement of $[\text{IP}_3]_i$

The muscle strips also were used for measuring  $[\text{IP}_3]_i$ . After preincubating three or four muscle strips for 30 min in PSS at 37°C, the muscle strips were first incubated with halothane-containing (0.0, 1.0, 2.0, or 3.0% in the gas phase) PSS for 2 min and then stimulated with  $10^{-5}$  M carbachol. The reactions were terminated after 0, 5, 10, 15, 30, 60, or 120 s of stimulation with carbachol by freezing the tissue samples in liquid nitrogen.<sup>14</sup>

The technique of Uemura *et al.*<sup>15</sup> was used to measure the  $[\text{IP}_3]_i$ . The frozen tissue sample was homogenized with 2 ml of 10% (vol/vol) ice-cold  $\text{HClO}_4$  for 20 min. A 200- $\mu\text{l}$  aliquot of the homogenized solution was used to measure concentrations of protein.<sup>16</sup> The remaining aliquots were centrifuged at 2,000g for 15 min to remove insoluble materials. The pH of the supernatant was adjusted precisely to 7.5 with 10 N KOH/HEPES. Insoluble precipitates (primarily  $\text{KClO}_4$ ) were removed by centrifugation at 2,000g for 10 min. The resultant supernatant was lyophilized and stored at  $-20^\circ\text{C}$ . The lyophilized samples were dissolved in 100  $\mu\text{l}$  distilled water, and the amount of  $\text{IP}_3$  was measured using the Amersham  $\text{IP}_3$  assay system (code TRK 1,000; Amersham Japan Co., Tokyo, Japan). This assay is based on competition between unlabeled  $\text{IP}_3$  in the samples and a fixed quantity of tritium-labeled  $\text{IP}_3$  for a limited number of high-affinity binding sites on a specific  $\text{IP}_3$  binding protein.<sup>17</sup> The determinations were made in duplicate, and the results were expressed as pmoles per milligram of protein.

### Determination of Concentrations of the Anesthetic Agent in the Bath Solution

The tissue samples in all experiments were quickly (within 10 s) exposed to a bath solution equilibrated with halothane (1.0, 2.0, or 3.0% in the gas phase) or isoflurane (1.5, 3.0, or 4.5% in the gas phase). The bath solution was continuously bubbled with the same concentration of the anesthetic agent. Concentrations of the anesthetic agents in bath solution samples were analyzed with a gas chromatograph (GC-12A; Shimadzu Co., Kyoto, Japan) equipped with a flame ionization detector (FTD-8; Shimadzu) and an integrator (Chromatopac C-R 3A; Shimadzu). The mean concentrations of halothane in the solution (1.0, 2.0, and 3.0% in the gas phase) were 0.33, 0.75, and 1.15 mM, respectively, whereas the mean concentrations of isoflurane in the solution (1.5, 3.0, and 4.5% in the gas phase) were 0.35, 0.79, and 1.21 mM, respectively. The concentration of the anesthetic agents in the bath solution had close linear correlation with the concentration in the gas phase, and the anesthetic potencies in dogs between these agents were comparable.<sup>18,19</sup>

### Materials

With the exceptions noted later, reagents were obtained from Sigma Chemical Co. (St. Louis, MO) and Dojindo Co. (Kumamoto, Japan). Halothane, caffeine, and the  $\text{IP}_3$  assay system were obtained from ICI Co.



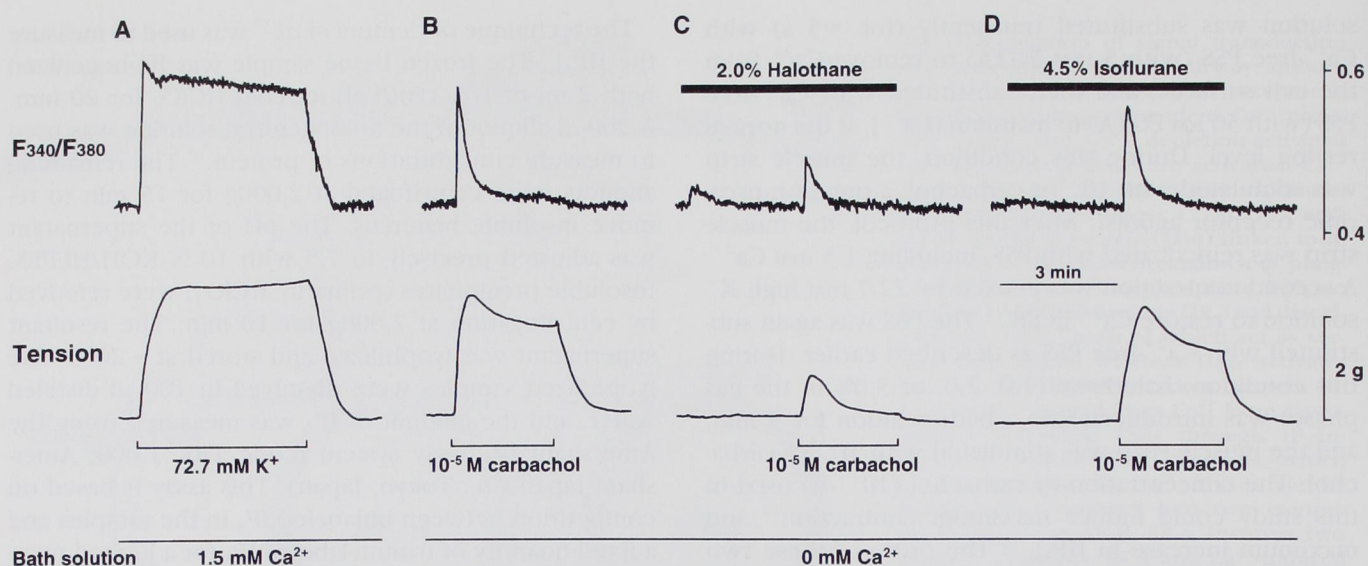

**Fig. 2.** Changes in intracellular concentration of free  $Ca^{2+}$  (indicated by  $F_{340}/F_{380}$  ratio) and muscle tension during contractions induced by high  $K^+$  (72.7 mM) with 1.5 mM  $Ca^{2+}$  (A) and by carbachol ( $10^{-5}$  M) without (B) or with 2.0% halothane (C)/4.5% isoflurane (D) during a  $Ca^{2+}$ -free condition. (C and D) Carbachol ( $10^{-5}$  M) was introduced 3 min after the incubation of halothane or isoflurane.

(Dighton, MA), Wako Pure Chemical Co. (Osaka, Japan), and Amersham Japan Co. (Tokyo, Japan), respectively.

#### Statistical Analysis

All data are expressed as mean  $\pm$  SD. For the measurement of  $[Ca^{2+}]_i$  and muscle tension, high  $K^+$ -induced sustained changes in  $[Ca^{2+}]_i$  (indicated by  $F_{340}/F_{380}$  ratio) and muscle tension were used as references (100%).<sup>2,10</sup> All data were analyzed using paired/unpaired two-tailed *t* test or one-factor analysis of variance with Fisher's *a posteriori* test. In all comparisons, a probability value  $<0.05$  was considered significant.

## Results

#### Effects of Halothane and Isoflurane on $[Ca^{2+}]_i$ and Muscle Tension

Figure 2 shows the effect of high  $K^+$  (72.7 mM) with 1.5 mM  $Ca^{2+}$  and the effects of carbachol ( $10^{-5}$  M) with or without halothane 2.0%/isoflurane 4.5% during  $Ca^{2+}$ -free conditions on  $[Ca^{2+}]_i$  and the tension of canine tracheal smooth muscle. The ratio  $F_{340}/F_{380}$ , an indicator of  $[Ca^{2+}]_i$ , was increased rapidly by high  $K^+$  with a concomitant muscle contraction (fig. 2A). After washout with the  $Ca^{2+}$ -free PSS, the resting levels of  $[Ca^{2+}]_i$  and muscle tension remained unchanged (fig. 2B). Dur-

ing this condition, carbachol ( $10^{-5}$  M) significantly increased muscle tension. This increased tension was followed by a slight decrease before the muscle tension reached a steady state. The peak and plateau levels of the muscle contraction were  $71.2 \pm 9.7$  and  $65.7 \pm 8.6\%$  of the contraction compared with the muscle tension induced by 72.7 mM high  $K^+$  with 1.5 mM  $Ca^{2+}$ . In contrast, carbachol during  $Ca^{2+}$ -free conditions induced a transient increase of  $[Ca^{2+}]_i$ , followed by a substantial reduction. The percent peak of  $[Ca^{2+}]_i$  was  $68.4 \pm 7.6\%$  compared with the  $[Ca^{2+}]_i$  induced by 72.7 mM high  $K^+$  with 1.5 mM  $Ca^{2+}$ .  $[Ca^{2+}]_i$  and muscle tension reached their respective peaks in 10–30 s. Pretreatment of halothane (2.0%) during  $Ca^{2+}$ -free conditions induced a slight and transient increase of  $[Ca^{2+}]_i$ , followed by a substantial reduction without change in the muscle tension (fig. 2C). During 2.0% halothane, carbachol ( $10^{-5}$  M) induced slight and transient increases of  $[Ca^{2+}]_i$  and muscle tension, followed by substantial reductions (fig. 2C). These changes in  $[Ca^{2+}]_i$  and muscle tension were smaller than those induced by carbachol without halothane. The order of the two protocols shown in figures 2B and 2C were randomized. There were no significant differences in the peak of  $[Ca^{2+}]_i$  or muscle tension obtained by consecutive carbachol stimulation (data not shown). To determine whether these effects were induced by other anesthetic agents as well, we



HALOTHANE AND INTRACELLULAR  $\text{Ca}^{2+}$  STORES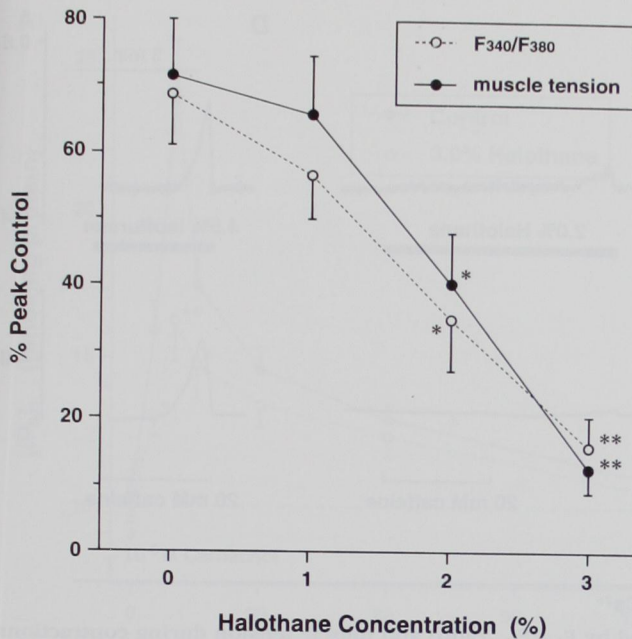

Fig. 3. Relation between concentrations of halothane in the gas phase and percent peak response of intracellular concentration of free  $\text{Ca}^{2+}$  (indicated by  $F_{340}/F_{380}$  ratio) or muscle tension stimulated by  $10^{-5}$  M carbachol during a  $\text{Ca}^{2+}$ -free condition. Symbols represent mean  $\pm$  SD ( $n = 8$  at each point). \* $P < 0.05$ ; \*\* $P < 0.01$  compared with the control value without halothane.

performed additional experiments using isoflurane in the absence of external  $\text{Ca}^{2+}$  (fig. 2D). Isoflurane at concentrations of up to 4.5% in the gas phase had no apparent effect on either muscle contraction (inhibited by  $\approx 9 \pm 4\%$  at 4.5% isoflurane) or the increase in  $[\text{Ca}^{2+}]_i$  (inhibited by  $\approx 7 \pm 2\%$  at 4.5% isoflurane) induced by carbachol ( $n = 8$  at each point).

Figure 3 shows the relation between concentrations of halothane and the percent response of  $[\text{Ca}^{2+}]_i$  or muscle tension. Halothane significantly decreased the peaks of  $[\text{Ca}^{2+}]_i$  by  $\approx 77\%$  and muscle tension by  $\approx 83\%$  in a dose-dependent manner.

Figure 4 shows the effects of caffeine (20 mM) and halothane (2.0%) or isoflurane (4.5%) during  $\text{Ca}^{2+}$ -free conditions on  $[\text{Ca}^{2+}]_i$  and the tension of canine tracheal smooth muscle. Caffeine (20 mM) induced increases in  $[\text{Ca}^{2+}]_i$  and muscle tension during the  $\text{Ca}^{2+}$ -free condition. These increases were transient (fig. 4A) and similar to those obtained by carbachol stimulation during a  $\text{Ca}^{2+}$ -free condition (fig. 2B).  $[\text{Ca}^{2+}]_i$  and muscle tension induced by caffeine reached their respective peaks in 10–30 s. Simultaneous administration of 2.0% halothane augmented the transient increases in  $[\text{Ca}^{2+}]_i$  and muscle

tension (fig. 4B). Figure 5 shows the relation between concentrations of halothane and the percent response of  $[\text{Ca}^{2+}]_i$  or muscle tension. Halothane significantly increased the peaks of  $[\text{Ca}^{2+}]_i$  by  $\approx 97\%$  and muscle tension by  $\approx 69\%$  in a dose-dependent manner. As shown in figure 2C, the pretreatment with halothane (2.0%) during the  $\text{Ca}^{2+}$ -free condition induced a slight and transient increase in  $[\text{Ca}^{2+}]_i$  without changing the muscle tension (fig. 4C). During this condition, caffeine (20 mM) exerted almost no effect on either  $[\text{Ca}^{2+}]_i$  or muscle tension during any concentration of halothane up to 3.0%. The order of these three protocols was randomized, and there were no significant differences in the peaks of either  $[\text{Ca}^{2+}]_i$  or muscle tension obtained by consecutive carbachol stimulation (data not shown).

We performed additional experiments using isoflurane in the absence of external  $\text{Ca}^{2+}$  as well (fig. 4D). Isoflurane at concentrations up to 4.5% in the gas phase had no apparent effect on either muscle contraction (increased by  $\approx 6 \pm 2\%$  at 4.5% isoflurane) or the increase in  $[\text{Ca}^{2+}]_i$  (increased by  $\approx 3 \pm 2\%$  at 4.5% isoflurane) induced by caffeine ( $n = 8$  at each point).

#### Effect of Halothane on $[\text{IP}_3]_i$

Figure 6A shows the time course and effects of 3.0% halothane on  $[\text{IP}_3]_i$  in carbachol-stimulated canine tracheal smooth muscle. The  $[\text{IP}_3]_i$  at time 0 was  $10.6 \pm 0.8$  pmol/mg protein ( $n = 8$ ) and failed to change with the addition of halothane ( $10.2 \pm 0.9$ ,  $10.6 \pm 0.8$ , and  $9.9 \pm 0.7$  pmol/mg protein at 1.0, 2.0, and 3.0% halothane, respectively). Carbachol ( $10^{-5}$  M) produced a rapid increase in the  $[\text{IP}_3]_i$ , which reached maximum ( $23.8 \pm 2.1$  pmol/mg protein) 10 s after the stimulation. The rapid increase in  $[\text{IP}_3]_i$  induced by carbachol was followed by a rapid and substantial decrease to a concentration of  $\approx 10$  pmol/mg protein. Halothane (3.0%) significantly inhibited the increase in  $[\text{IP}_3]_i$  induced by carbachol 5–15 s after stimulation with carbachol with no apparent change in the time course of  $[\text{IP}_3]_i$ . Figure 6B summarizes the effects of various concentrations of halothane (0.0, 1.0, 2.0, and 3.0%) on the peak  $[\text{IP}_3]_i$  10 s after stimulation with carbachol. Halothane significantly inhibited in a dose-dependent manner the increase in  $[\text{IP}_3]_i$  by  $\approx 32\%$  induced by carbachol.

#### Discussion

The major findings of this study are that, in canine tracheal smooth muscle *in vitro*, clinically relevant con-



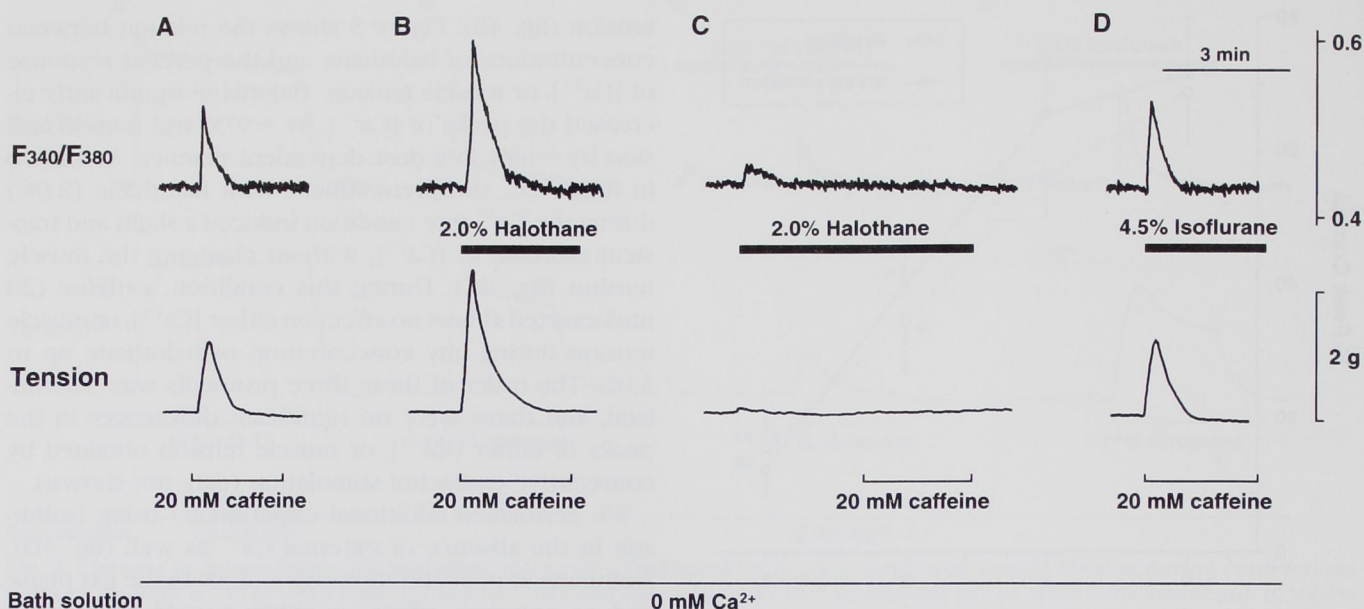

**Fig. 4.** Changes in intracellular concentration of free  $Ca^{2+}$  (indicated by  $F_{340}/F_{380}$  ratio) and muscle tension during contractions induced by caffeine (20 mM) without (A) or with 2.0% halothane (B, C)/4.5% isoflurane (D) during a  $Ca^{2+}$ -free condition. Caffeine (20 mM) was introduced alone (A), with 2.0% halothane (B) or 4.5% isoflurane (D) simultaneously and with the preincubation of 2.0% halothane (C).

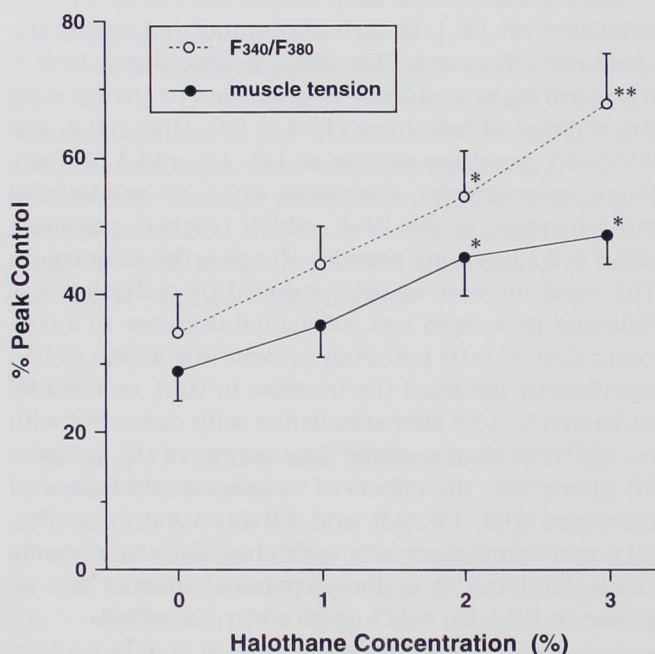

**Fig. 5.** Relation between concentrations of halothane in the gas phase and percent peak response of intracellular concentration of free  $Ca^{2+}$  (indicated by  $F_{340}/F_{380}$  ratio) or muscle tension stimulated by caffeine (20 mM). Symbols represent mean  $\pm$  SD ( $n = 8$  at each point). \* $P < 0.05$ ; \*\* $P < 0.01$  compared with the control value without halothane.

centrations of halothane altered the intracellular free  $Ca^{2+}$  transient and attenuated the muscle contraction induced by muscarinic receptor stimulation even without external  $Ca^{2+}$ . These effects were dose-dependent at the concentrations of halothane studied and are consistent with the previous study that used the luminescent  $Ca^{2+}$  indicator aequorin.<sup>20</sup>

In airway smooth muscle, muscarinic receptor stimulation activates the plasma membrane-bound phospholipase C via G proteins (fig. 1).<sup>21</sup> Phospholipase C subsequently catalyzes the hydrolysis of membrane-associated phosphatidylinositol 4,5-bisphosphate to  $IP_3$  and diacylglycerol. A rapid increase in  $[IP_3]_i$  induces release of  $Ca^{2+}$  from the SR via IICR channels.<sup>8,22</sup> Diacylglycerol activates  $Ca^{2+}$ /phospholipid-dependent protein kinase at its membrane site, resulting in sensitization of the contractile elements to intracellular  $Ca^{2+}$ .<sup>2,5,12</sup> Stimulation of muscarinic receptors also increases the slow influx of extracellular  $Ca^{2+}$  across the plasma membrane.<sup>3,23</sup> An additive increase in  $[Ca^{2+}]_i$  activates the  $Ca^{2+}$ - and calmodulin-dependent myosin light chain kinase, resulting in the contraction of the muscle cells.<sup>3</sup> Release of  $Ca^{2+}$  from the SR is therefore important to initiate the muscle contraction.<sup>2-4,12,20</sup>

This study shows that the airway smooth muscle-sustained contraction can be obtained during  $Ca^{2+}$ -free



HALOTHANE AND INTRACELLULAR  $\text{Ca}^{2+}$  STORES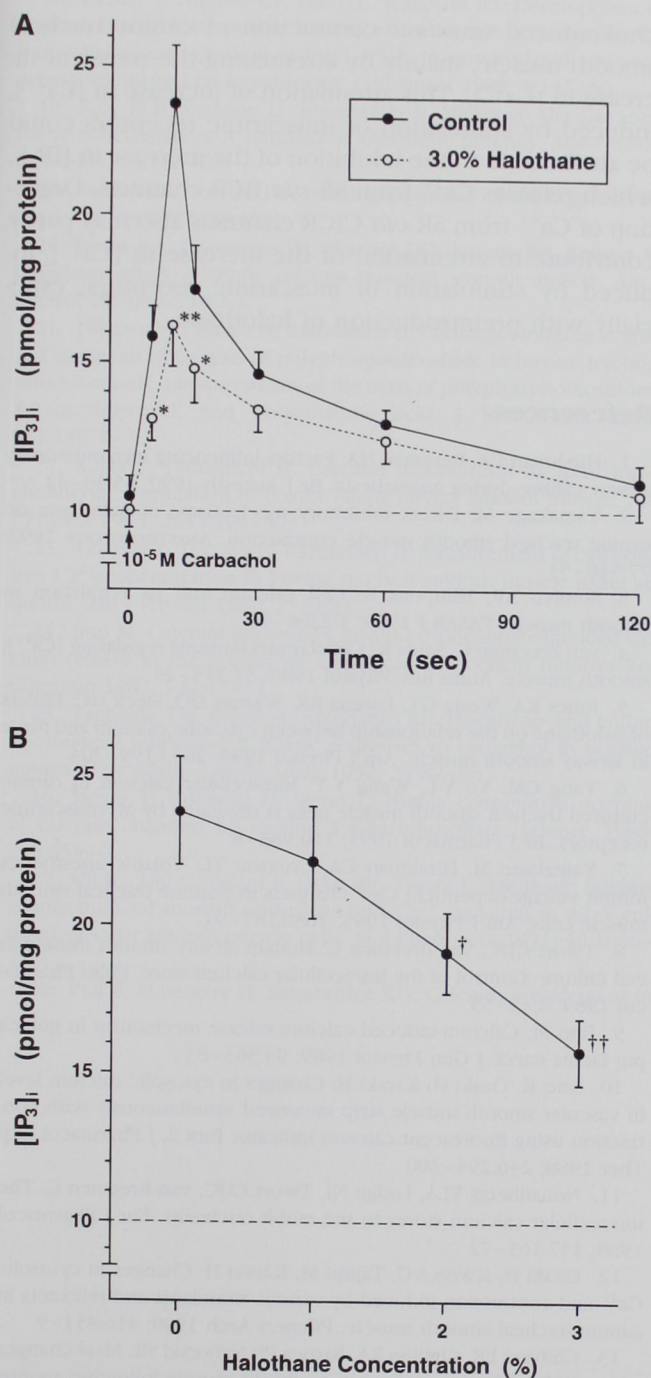

Fig. 6. Effects of halothane on intracellular concentration of inositol 1,4,5-triphosphate ( $[\text{IP}_3]_i$ ) of carbachol-stimulated canine tracheal smooth muscle. (A) Effects of 3.0% halothane on time-dependent changes in the  $[\text{IP}_3]_i$  induced by  $10^{-5}$  M carbachol. (B) Effect of halothane (0.0, 1.0, 2.0, and 3.0%) on the peak  $[\text{IP}_3]_i$  10 s after stimulation with carbachol. Symbols represent mean  $\pm$  SD ( $n = 8$  at each point). \* $P < 0.05$ ; \*\* $P < 0.01$  compared with the control values for the same time course. † $P < 0.05$ ; †† $P < 0.01$  compared with the control value without halothane.

conditions although influx of  $\text{Ca}^{2+}$  is important to maintain the muscle contraction.<sup>2-4,12</sup> The muscle contraction seen during the  $\text{Ca}^{2+}$ -free condition should be divided into two parts: (1) initial transient contraction with a concomitant increase in  $[\text{Ca}^{2+}]_i$ ; and (2) decreased but sustained contraction with a substantial decrease in  $[\text{Ca}^{2+}]_i$ . Because in airway smooth muscle  $\text{IP}_3$  is the primary regulator for release of  $\text{Ca}^{2+}$  from SR,<sup>8</sup> and because the time course of the increase in  $[\text{IP}_3]_i$  induced by carbachol was very similar to that of the change in  $[\text{Ca}^{2+}]_i$  (figs. 2 and 6A), we suggest that  $\text{IP}_3$  is an important determinant of  $[\text{Ca}^{2+}]_i$  during agonist stimulation during  $\text{Ca}^{2+}$ -free conditions, whereas IICR is also regulated by  $[\text{Ca}^{2+}]_i$ .<sup>9,24</sup> Accordingly, our results that halothane significantly attenuated the increase in  $[\text{IP}_3]_i$  induced by muscarinic receptor stimulation (fig. 6) supported the results wherein the initial transient increase in muscle tension was significantly inhibited by halothane with a concomitant reduction of increase in  $[\text{Ca}^{2+}]_i$  (figs. 2 and 3).<sup>25</sup> Because the release of  $\text{Ca}^{2+}$  from SR depends on the cube of  $[\text{IP}_3]_i$ ,<sup>26</sup> and the resting level of  $[\text{IP}_3]_i$  is  $\approx 10$  pmol/mg protein (fig. 6), it seems reasonable that the changes in carbachol-induced  $[\text{IP}_3]_i$  produced by halothane do not linearly parallel the halothane-induced changes in carbachol-induced  $\text{Ca}^{2+}$ /tension changes (fig. 3).

Our results are in general agreement with studies in a variety of cell types, in which treatment with halothane has been associated with inhibition of the increase in  $[\text{Ca}^{2+}]_i$  mediated by  $\text{IP}_3$ .<sup>27-30</sup> These studies have demonstrated that halothane alters  $\text{Ca}^{2+}$  homeostasis, an action that underlies the *in vivo* effect of the anesthetic agent. Smart *et al.*<sup>31</sup> and Rooney *et al.*,<sup>32</sup> however, showed that halothane induced formation of  $\text{IP}_3$  in SH-SY5Y neuroblastoma cells and turkey erythrocytes, respectively. These discrepancies may result from the differences in cell types and species or in the selective effects of halothane on certain receptors, G proteins, or phospholipase C isozymes.<sup>33</sup>

The latter part of the sustained contraction obtained by stimulation of muscarinic receptors during a  $\text{Ca}^{2+}$ -free condition could be in part attributable to the protein kinase C-induced sensitization of contractile elements to  $\text{Ca}^{2+}$ .<sup>2,12</sup> Accordingly, the inhibition of the latter portion of the sustained contraction by halothane might partly be explained by the previously reported evidence that activity of protein kinase C is attenuated by halothane<sup>2</sup> and by the finding that the increase in  $[\text{IP}_3]_i$  induced by carbachol was inhibited by halothane in this study (fig. 6).



Another kind of  $\text{Ca}^{2+}$  release channel, CICR channels, also exist in the SR membrane.<sup>9</sup> The SR has been functionally separated into two components: SR- $\alpha$  and SR- $\beta$ .<sup>9</sup> SR- $\alpha$  involves two types of channels, IICR and CICR channels, whereas SR- $\beta$  involves only IICR channels (fig. 1).<sup>9,24,34</sup> Because evidence shows that an increase in  $[\text{Ca}^{2+}]_i$  *per se* induces release of  $\text{Ca}^{2+}$  from the SR *via* CICR channels,<sup>9</sup> there is a possibility that release of  $\text{Ca}^{2+}$  *via* the CICR channels partly involves the increase in  $[\text{Ca}^{2+}]_i$  induced by stimulation of muscarinic receptors during the  $\text{Ca}^{2+}$ -free condition. We conducted another experiment on the effect of halothane on the CICR channels using the CICR opener<sup>9</sup> caffeine. As shown in figures 4 and 5, simultaneous administration of halothane in a dose-dependent manner significantly enhanced the release of  $\text{Ca}^{2+}$  by stimulation with caffeine. Conversely, the pretreatment with halothane apparently abolished the effect of caffeine on  $[\text{Ca}^{2+}]_i$ . Because the sole administration of halothane as shown in figures 2 and 4 transiently increased  $[\text{Ca}^{2+}]_i$ , we conclude that halothane settles the CICR channels into an open state. This results in depletion of  $\text{Ca}^{2+}$  from the SR- $\alpha$  and attenuation of the increase in  $[\text{Ca}^{2+}]_i$  induced by caffeine. The preintroduction of halothane therefore could have a partial role in the inhibition of the initial increase in  $[\text{Ca}^{2+}]_i$  induced by stimulation of muscarinic receptors. These results are consistent with some other investigations. In unstimulated cardiac,<sup>35-37</sup> skeletal,<sup>38</sup> and vascular smooth<sup>27,39</sup> muscles, halothane causes depletion of  $\text{Ca}^{2+}$  from the SR either by attenuating uptake of  $\text{Ca}^{2+}$  from the cytosol or by release of  $\text{Ca}^{2+}$  from the SR *via* CICR channels. Recently, Warner *et al.*<sup>40</sup> showed that halothane decreased  $[\text{Ca}^{2+}]_i$  and muscle force in canine tracheal smooth muscle, only when they used submaximum stimulation and not maximum stimulation. This discrepancy may result from the differences in types and concentrations of agonists and from differences in experimental techniques we used. Further, the role of attenuation of uptake of  $\text{Ca}^{2+}$  into SR by halothane is unknown in airway smooth muscle.

It is noteworthy that isoflurane had little effect on the muscle contraction and increase in  $[\text{Ca}^{2+}]_i$  induced either by carbachol or by caffeine during  $\text{Ca}^{2+}$ -free conditions (figs. 2 and 4). This observation parallels the clinical observation that halothane is more effective than other anesthetic agents at inhibiting airway smooth muscle contraction at clinical concentrations.<sup>1</sup> In addition, isoflurane does not activate release and depletion of  $\text{Ca}^{2+}$  from the SR *via* CICR as does halothane.

Halothane, during  $\text{Ca}^{2+}$ -free conditions, inhibits carba-

chol-induced transient contraction of canine tracheal smooth muscle, mainly by attenuating the transient increase in  $[\text{Ca}^{2+}]_i$ . This attenuation of increase in  $[\text{Ca}^{2+}]_i$  induced by stimulation of muscarinic receptors could be attributable to the inhibition of the increase in  $[\text{IP}_3]_i$ , which releases  $\text{Ca}^{2+}$  from SR *via* IICR channels. Depletion of  $\text{Ca}^{2+}$  from SR *via* CICR channels also may partly contribute to attenuation of the increase in  $[\text{Ca}^{2+}]_i$  induced by stimulation of muscarinic receptors, especially with preintroduction of halothane.

## References

1. Hirshman CA, Bergman NA: Factors influencing intrapulmonary airway calibre during anaesthesia. *Br J Anaesth* 1990; 65:30-42
2. Yamakage M: Direct inhibitory mechanisms of halothane on canine tracheal smooth muscle contraction. *ANESTHESIOLOGY* 1992; 77:546-53
3. Somlyo AP, Himpens B: Cell calcium and its regulation in smooth muscle. *FASEB J* 1989; 3:2266-76
4. van Breemen C, Saida K: Cellular mechanisms regulating  $[\text{Ca}^{2+}]_i$  smooth muscle. *Annu Rev Physiol* 1989; 51:315-29
5. Jones KA, Wong GY, Lorenz RR, Warner DO, Sieck GC: Effects of halothane on the relationship between cytosolic calcium and force in airway smooth muscle. *Am J Physiol* 1994; 266:L199-204
6. Yang CM, Yo Y-L, Wang Y-Y: Intracellular calcium in canine cultured tracheal smooth muscle cells is regulated by  $M_3$  muscarinic receptors. *Br J Pharmacol* 1993; 110:983-8
7. Yamakage M, Hirshman CA, Croxton TL: Volatile anesthetics inhibit voltage-dependent  $\text{Ca}^{2+}$  channels in porcine tracheal smooth muscle cells. *Am J Physiol* 1995; 268:L187-91
8. Twort CHC, van Breemen C: Human airway smooth muscle in cell culture: Control of the intracellular calcium store. *Pulm Pharmacol* 1989; 2:45-53
9. Iino M: Calcium-induced calcium release mechanism in guinea pig taenia caeci. *J Gen Physiol* 1989; 94:363-83
10. Sato K, Ozaki H, Karaki H: Changes in cytosolic calcium level in vascular smooth muscle strip measured simultaneously with contraction using fluorescent calcium indicator fura 2. *J Pharmacol Exp Ther* 1988; 246:294-300
11. Nouailhetas VLA, Lodge NJ, Twort CHC, van Breemen C: The intracellular calcium stores in the rabbit trachealis. *Eur J Pharmacol* 1988; 157:165-72
12. Ozaki H, Kwon S-C, Tajimi M, Karaki H: Changes in cytosolic  $\text{Ca}^{2+}$  and contraction induced by various stimulants and relaxants in canine tracheal smooth muscle. *Pflugers Arch* 1990; 416:351-9
13. Chilvers ER, Challiss RA, Barnes PJ, Nahorski SR: Mass changes of inositol(1,4,5)triphosphate in trachealis muscle following agonist stimulation. *Eur J Pharmacol* 1989; 164:587-90
14. Meek JL: Inositol bis-, tris-, and tetrakis(phosphate)s: Analysis in tissues by HPLC. *Proc Natl Acad Sci U S A* 1986; 83:4162-6
15. Uemura Y, Sakon M, Kambayashi J, Tsujinaka T, Mori T: Involvement of inositol 1,4,5-triphosphate in  $\text{Ca}^{2+}$  influx in thrombin stimulated human platelets. *Biochem Int* 1989; 18:335-41
16. Lowry OH, Rosebrough NJ, Farr AL, Randall RJ: Protein measurement with the Folin phenol reagent. *J Biol Chem* 1951; 193:265-75



HALOTHANE AND INTRACELLULAR  $\text{Ca}^{2+}$  STORES

17. Palmer S, Hughes KT, Lee DY, Wakelam JO: Development of a novel,  $\text{Ins}(1,4,5)\text{P}_3$ -specific binding assay: Its use to determine the intracellular concentration of  $\text{Ins}(1,4,5)\text{P}_3$  in unstimulated and vasopressin-stimulated rat hepatocytes. *Cell Signal* 1989; 1:147-56
18. Eger EI II, Saidman LJ, Brandstater B: Minimum alveolar anesthetic concentration: A standard of anesthetic potency. *ANESTHESIOLOGY* 1965; 26:756-63
19. Steffey EP, Howland D: Isoflurane potency in the dog and cat. *Am J Vet Res* 1977; 38:1833-6
20. Jones KA, Housmans PR, Warner DO, Lorenz RR, Rehder K: Halothane alters cytosolic calcium transient smooth muscle. *Am J Physiol* 1993; 265:L80-6
21. Takuwa Y, Takuwa N, Rasmussen H: Carbachol induces a rapid and sustained hydrolysis of polyphosphoinositide in bovine tracheal smooth muscle, measurements of the mass of polyphosphoinositides, 1,2-diacylglycerol, and phosphatidic acid. *J Biol Chem* 1986; 261:14670-5
22. Kajita J, Yamaguchi H: Calcium mobilization by muscarinic cholinergic stimulation in bovine single airway smooth muscle. *Am J Physiol* 1993; 264:L496-503
23. Takuwa Y, Takuwa N, Rasmussen H: Measurement of cytosolic free  $\text{Ca}^{2+}$  concentration in bovine tracheal smooth muscle using aequorin. *Am J Physiol* 1987; 253:C817-27
24. Iino M: Calcium dependent inositol triphosphate-induced calcium release in the guinea-pig taenia caeci. *Biochem Biophys Res Commun* 1987; 142:47-52
25. Tagliente TM, Evans PJ, Ben-Harari RR: Halothane- and enflurane-induced inhibition of phasic responses to carbachol in isolated guinea pig trachea. *Anesth Analg* 1992; 74:89-96
26. Meyer T, Holowka D, Stryer L: Highly cooperative opening of calcium channels by inositol 1,4,5-triphosphate. *Science* 1988; 240:653-6
27. Sill JC, Uhl C, Eskuri S, Dyke RV, Tarara J: Halothane inhibits agonist-induced inositol phosphate and  $\text{Ca}^{2+}$  signaling in A7r5 cultured vascular smooth muscle cells. *Mol Pharmacol* 1991; 40:1006-13
28. Puil E, El-Beheiry H, Baimbridge KG: Calcium involvement in anesthetic blockade of synaptic transmission. *Ann N Y Acad Sci* 1991; 625:82-90
29. Loeb AL, Longnecker DE, Williamson JR: Alteration of calcium mobilization in endothelial cells by volatile anesthetics. *Biochem Pharmacol* 1993; 45:1137-42
30. Kohro S, Yamakage M: Direct inhibitory mechanisms of halothane on human platelet aggregation. *ANESTHESIOLOGY* 1996; 85:96-106
31. Smart D, Smith G, Lambert DG: Halothane and isoflurane enhance basal and carbachol-stimulated inositol(1,4,5)triphosphate formation in SH-SY5Y human neuroblastoma cells. *Biochem Pharmacol* 1994; 47:939-45
32. Rooney TA, Hager R, Stubbs CD, Thomas AP: Halothane regulates G-protein-dependent phospholipase C activity in turkey erythrocyte membranes. *J Biol Chem* 1993; 268:15550-6
33. Lambert DG: Signal transduction: G proteins and second messengers. *Br J Anaesth* 1993; 71:86-95
34. Iino M, Kobayashi T, Endo M: Use of ryanodine for functional removal of the calcium store in smooth muscle cells of the guinea-pig. *Biochem Biophys Res Commun* 1988; 152:417-22
35. Frazer MJ, Lynch C III: Halothane and isoflurane effects on  $\text{Ca}^{2+}$  fluxes of isolated myocardial sarcoplasmic reticulum. *ANESTHESIOLOGY* 1992; 77:316-23
36. Lynch C III, Frazer MJ: Anesthetic alteration of ryanodine binding by cardiac calcium release channels. *Biochim Biophys Acta* 1994; 1194:109-17
37. Connelly TJ, Coronado R: Activation of the  $\text{Ca}^{2+}$  release channel of cardiac sarcoplasmic reticulum by volatile anesthetics. *ANESTHESIOLOGY* 1984; 81:459-69
38. Blanck TJJ, Peterson CV, Baroody B, Tegazzin V, Lou J: Halothane, enflurane, and isoflurane stimulate calcium leakage from rabbit sarcoplasmic reticulum. *ANESTHESIOLOGY* 1992; 76:813-21
39. Su JY, Zhang CC: Intracellular mechanisms of halothane's effect on isolated aortic strips of the rabbit. *ANESTHESIOLOGY* 1989; 71:409-17
40. Warner DO, Jones KA, Lorenz RR: The effects of halothane pretreatment on manganese influx induced by muscarinic stimulation of airway smooth muscle. *Anesth Analg* 1997; 84:1366-71
